# Supplementary material for: Di-(2-Ethylhexyl) Phthalate (DEHP) in House Dust in Canadian Homes: Behaviors and Associations with Housing Characteristics and Consumer Products
Source: Hindawi journal article supplement (doi:10.1155/2023/4655289), 2023-07-25
Supplement: f1 [file 4655289.f1.docx]

**Supplementary Information**

Table S1. Distribution of building materials from the RA home assessment

Table S2. Distribution of consumer products and behaviors related to DEHP exposure from the questionnaire and home assessment

Table S3. Crude odds ratio (95% CI) of housing characteristics for dichotomized DEHP concentration in logistic regression models

Table S4. Distribution of housing characteristics by DEHP quartiles

Figure S1. Distribution of DEHP concentrations by other characteristics (insignificant results)

Figure S2. DEHP in dust concentrations by household income groups

Table S5. Distribution of DEHP-related housing characteristics by household income

Table S6. Correlation between DEHP concentrations across two home visits

Table S7. Distribution of dichotomized DEHP levels in bedrooms and most used family rooms

Table S8. Comparison of median phthalate concentrations (μg/g) in dust as reported in other studies

References

## Table S1. Distribution of building materials from the RA home assessment

| Variable | Count and frequency (n=726) |
| --- | --- |
| Flooring type in mother’s bedroom |  |
| area rug | 45 (6.2%) |
| hard vinyl (tiles) | 8 (1.1%) |
| hard wood | 238 (32.8%) |
| installed carpet | 348 (47.9%) |
| laminate | 61 (8.4%) |
| soft vinyl (tiles/sheet) | 6 (0.8%) |
| Flooring type in child’s bedroom |  |
| area rug | 52 (7.2%) |
| hard vinyl (tiles) | 4 (0.6%) |
| hard wood | 195 (26.9%) |
| installed carpet | 231 (31.8%) |
| laminate | 54 (7.4%) |
| soft vinyl (tiles/sheet) | 4 (0.6%) |
| Flooring type in the most used living room |  |
| area rug | 127 (17.5%) |
| hard vinyl (tiles) | 5 (0.7%) |
| hard wood | 321 (44.2%) |
| installed carpet | 153 (21.1%) |
| laminate | 70 (9.6%) |
| soft vinyl (tiles/sheet) | 8 (1.1%) |
| Flooring type in the kitchen |  |
| area rug | 75 (10.3%) |
| ceramic tiles | 200 (27.5%) |
| hard vinyl (tiles) | 43 (5.9%) |
| hardwood | 102 (14.0%) |
| installed carpet | 2 (0.3%) |
| laminate | 60 (8.3%) |
| soft vinyl | 214 (29.5%) |
| Flooring type in the bathroom |  |
| area rug | 19 (2.6%) |
| ceramic tiles | 402 (55.4%) |
| hard vinyl (tiles) | 31 (4.3%) |
| hardwood | 1 (0.1%) |
| laminate | 4 (0.6%) |
| soft vinyl | 238 (32.8%) |
| Have a child bedroom |  |
| no | 154 (21.2%) |
| yes | 567 (78.1%) |
| Wallpaper in the child’s bedroom |  |
| no | 556 (76.6%) |
| yes | 11 (1.5%) |
| not applicable | 154 (21.2%) |
| Wallpaper in the living room |  |
| no | 716 (98.6%) |
| yes | 5 (0.7%) |
| Paint as wall surface covering |  |
| no | 640 (88.2%) |
| yes | 81 (11.2%) |
| Wallpaper in the mother’s bedroom |  |
| no | 708 (97.5%) |
| yes | 13 (1.8%) |
| missing | 5 (0.7%) |
| PVC panel as the wall covering in the child’s bedroom |  |
| no | 566 (78.0%) |
| yes | 1 (0.1%) |
| not applicable | 154 (21.2%) |
| missing | 5 (0.7%) |
| PVC panel as the wall covering in the living room |  |
| no | 721 (99.3%) |
| missing | 5 (0.7%) |
| PVC panel as the wall covering in the mother’s bedroom |  |
| no | 720 (99.2%) |
| yes | 1 (0.1%) |
| missing | 5 (0.7%) |
| Plastic blind in the child’s room |  |
| no | 395 (54.4%) |
| yes | 172 (23.7%) |
| not applicable | 154 (21.2%) |
| missing | 5 (0.7%) |
| Plastic blind in the living room |  |
| no | 546 (75.2%) |
| yes | 161 (22.2%) |
| not applicable | 14 (1.9%) |
| missing | 5 (0.7%) |
| Plastic blind in the mother’s room |  |
| no | 498 (68.6%) |
| yes | 201 (27.7%) |
| not applicable | 22 (3.0%) |
| missing | 5 (0.7%) |

## Table S2. Distribution of consumer products and behaviors related to DEHP exposure from the questionnaire and home assessment

| **Variable** | **Count and frequency (n=726)** |
| --- | --- |
| **quantity of plastic/vinyl furniture in mother's bedroom** |  |
| >=4 pieces | 152 (20.9%) |
| 1 piece | 183 (25.2%) |
| 2-3 pieces | 202 (27.8%) |
| no | 169 (23.3%) |
| **Quantity of plastic/vinyl furniture in child's bedroom** |  |
| >=5 pieces | 113 (15.6%) |
| 1-2 pieces | 148 (20.4%) |
| 3-4 pieces | 118 (16.3%) |
| no | 78 (10.7%) |
| **Quantity of plastic/vinyl furniture in living room** |  |
| >=4 pieces | 206 (28.4%) |
| 1 piece | 166 (22.9%) |
| 2-3 pieces | 208 (28.7%) |
| no | 137 (18.9%) |
| **Quantity of plastic toys in mother's bedroom** |  |
| none | 477 (65.7%) |
| 1-4 pieces | 160 (22.0%) |
| ≥5 pieces | 40 (5.5%) |
| missing | 12 (1.7%) |
| skipped the questionnaire | 5 (0.7%) |
| **Plastic playmat in mother's bedroom** |  |
| none | 670 (92.3%) |
| 1-4 pieces | 7 (1.0%) |
| ≥5 pieces | 1 (0.1%) |
| missing | 16 (2.2%) |
| **Quantity of plastic toys in living room** |  |
| none | 159 (21.9%) |
| 1-4 pieces | 252 (34.7%) |
| ≥5 pieces | 276 (38.0%) |
| missing | 7 (1.0 %) |
| **Plastic playmats in living room** |  |
| none | 562 (77.4%) |
| 1-4 pieces | 101 (13.9%) |
| ≥5 pieces | 25 (3.4%) |
| missing | 6 (0.8%) |
| **Quantity of plastic toys in child's bedroom** |  |
| none | 163 (22.5%) |
| 1-4 pieces | 213 (29.3%) |
| ≥5 pieces | 167 (23.0%) |
| no child's room | 143 (19.7%) |
| missing | 8 (1.1%) |
| **Plastic playmat in mother's bedroom** |  |
| none | 511 (70.4%) |
| 1-4 pieces | 25 (3.4%) |
| ≥5 pieces | 8 (1.1%) |
| not applicable | 143 (19.7%) |
| missing | 7 (1%) |
| **Allergy control mattress covering on mother's bed** |  |
| no | 337 (46.4%) |
| yes | 154 (21.2%) |
| not applicable or missing | 235 (32.4%) |
| **Allergy control mattress covering on mother's bed** |  |
| no | 173 (23.8%) |
| yes | 84 (11.6%) |
| not applicable or missing | 872 (64.6%) |
| **Frequency of ventilation in child's bedroom in summer** |  |
| never | 72 (9.9%) |
| 1-2 times/month | 31 (4.3%) |
| 1-2 times/week | 51 (7.0%) |
| >2 times/week | 121 (16.7%) |
| **Frequency of ventilation in child's bedroom in winter** |  |
| never | 213 (29.3%) |
| 1-2 times/month | 33 (4.5%) |
| 1-2 times/week | 21 (2.9%) |
| >2 times/week | 12 (1.7%) |
| **Frequency of ventilation in living room in summer** |  |
| never | 86 (11.8%) |
| 1-2 times/month | 53 (7.3%) |
| 1-2 times/week | 84 (11.6%) |
| >2 times/week | 326 (44.9%) |
| **Frequency of ventilation in living room in winter** |  |
| never | 317 (43.7%) |
| 1-2 times/month | 111 (15.3%) |
| 1-2 times/week | 63 (8.7%) |
| >2 times/week | 56 (7.7%) |
| **Frequency of ventilation in mother's bedroom in summer** |  |
| never | 367 (50.6%) |
| 1-2 times/month | 110 (15.2%) |
| 1-2 times/week | 59 (8.1%) |
| >2 times/week | 81 (11.2%) |
| **Frequency of ventilation in mother's bedroom in winter** |  |
| never | 367 (50.6%) |
| 1-2 times/month | 110 (15.2%) |
| 1-2 times/week | 59 (8.1%) |
| >2 times/week | 81 (11.2%) |
| **Fan in the bathroom** |  |
| no | 136 (18.7%) |
| yes | 546 (75.2%) |
| **Frequency of using fan in bathroom** |  |
| never | 17 (2.3%) |
| rarely | 56 (7.7%) |
| occasionally | 91 (12.5%) |
| regularly | 379 (52.2%) |
| not applicable | 138 (19.0%) |
| **Frequency of using floor polish** |  |
| no | 623 (85.8%) |
| less than monthly | 27 (3.7%) |
| monthly | 17 (2.3%) |
| weekly | 14 (1.9%) |
| daily | 1 (0.1%) |
| missing | 12 (1.7%) |
| **Frequency of using furniture polish** |  |
| no | 548 (75.5%) |
| less than monthly | 57 (7.9%) |
| monthly | 39 (5.4%) |
| weekly | 39 (5.4%) |
| daily | 1 (0.1%) |
| missing | 10 (1.4%) |
| **Frequency of using dusting polish** |  |
| no | 542 (74.7%) |
| less than monthly | 37 (5.1%) |
| monthly | 37 (5.1%) |
| weekly | 63 (8.7%) |
| daily | 4 (0.6%) |
| missing | 11 (1.5%) |
| **Operating an air cleaner or purifier in the home** |  |
| no | 563 (77.5%) |
| yes | 112 (15.4%) |
| **Frequency of using air cleaner** |  |
| rarely | 7 (1.0%) |
| occasionally | 31 (4.3%) |
| regularly | 72 (9.9%) |
| not applicable | 572 (78.8%) |

## Table S3. Crude odds ratio (95% CI) of housing characteristics for dichotomized DEHP concentration in logistic regression models

| **Factor** | **OR (95%CI)** | **P-value** |
| --- | --- | --- |
| Vinyl tiles in kitchen or bathroom  (yes: no) | 1.77 (1.07-2.98) | <0.05 |
| Quantity of vinyl furniture (highest : lowest) | 1.66 (1.11-2.49) | <0.05 |
| Use of mattress covering  (yes: no) | 0.46 (0.26-0.78) | <0.01 |
| Mold signs in the house  (yes: no) | 1.60 (1.17-2.19) | <0.01 |

## Table S4. Distribution of housing characteristics by DEHP quartiles

|  | **Q1 (n=147)** | **Q2 (n=180)** | **Q3 (n=200)** | **Q4 (n=191)** | **Total (n=726)** |
| --- | --- | --- | --- | --- | --- |
| **Furniture polish** |  |  |  |  |  |
| no | 120 (81.6%) | 142 (78.9%) | 158 (79.0%) | 139 (72.8%) | 565 (77.8%) |
| yes | 20 (13.6%) | 29 (16.1%) | 30 (15.0%) | 43 (22.5%) | 124 (17.1%) |
| **Floor polish** |  |  |  |  |  |
| no | 130 (88.4%) | 157 (87.2%) | 181 (90.5%) | 171 (89.5%) | 645 (88.8%) |
| yes | 10 (6.8%) | 14 (7.8%) | 7 (3.5%) | 11 (5.8%) | 44 (6.1%) |
| **Dusting polish/spray** |  |  |  |  |  |
| no | 120 (81.6%) | 154 (85.6%) | 178 (89.0%) | 165 (86.4%) | 621 (85.5%) |
| yes | 20 (13.6%) | 17 (9.4%) | 10 (5.0%) | 17 (8.9%) | 68 (9.4%) |
| **Hard vinyl floor in mother’s room** |  |  |  |  |  |
| no | 146 (99.3%) | 177 (98.3%) | 197 (98.5%) | 182 (95.3%) | 710 (97.8%) |
| yes | 1 (0.7%) | 3 (1.7%) | 1 (0.5%) | 6 (3.1%) | 11 (1.5%) |
| **Laminate floor in mother’s bedroom** |  |  |  |  |  |
| no | 132 (89.8%) | 161 (89.4%) | 177 (88.5%) | 162 (84.8%) | 640 (88.2%) |
| yes | 15 (10.2%) | 19 (10.6%) | 21 (10.5%) | 26 (13.6%) | 81 (11.2%) |
| **Soft vinyl floor in mother’s bedroom** |  |  |  |  |  |
| no | 140 (95.2%) | 169 (93.9%) | 188 (94.0%) | 179 (93.7%) | 683 (94.1%) |
| yes | 0 (0%) | 2 (1.1%) | 0 (0%) | 3 (1.6%) | 6 (0.8%) |
| **Hard vinyl floor in child’s bedroom** |  |  |  |  |  |
| no | 121 (82.3%) | 143 (79.4%) | 149 (74.5%) | 142 (74.3%) | 562 (77.4%) |
| yes | 0 (0%) | 2 (1.1%) | 1 (0.5%) | 2 (1.0%) | 5 (0.7%) |
| **Laminate floor in child’s bedroom** |  |  |  |  |  |
| no | 106 (72.1%) | 129 (71.7%) | 131 (65.5%) | 118 (61.8%) | 491 (67.6%) |
| yes | 15 (10.2%) | 16 (8.9%) | 19 (9.5%) | 26 (13.6%) | 76 (10.5%) |
| **Hard vinyl floor in the living room** |  |  |  |  |  |
| no | 144 (98.0%) | 177 (98.3%) | 197 (98.5%) | 183 (95.8%) | 709 (97.7%) |
| yes | 3 (2.0%) | 3 (1.7%) | 1 (0.5%) | 5 (2.6%) | 12 (1.7%) |
| **Laminate floor in the living room** |  |  |  |  |  |
| no | 124 (84.4%) | 142 (78.9%) | 156 (78.0%) | 150 (78.5%) | 579 (79.8%) |
| yes | 23 (15.6%) | 38 (21.1%) | 42 (21.0%) | 38 (19.9%) | 142 (19.6%) |
| **Hard vinyl floor in the kitchen** |  |  |  |  |  |
| no | 138 (93.9%) | 175 (97.2%) | 183 (91.5%) | 170 (89.0%) | 673 (92.7%) |
| yes | 9 (6.1%) | 5 (2.8%) | 15 (7.5%) | 18 (9.4%) | 48 (6.6%) |
| **Laminate floor in the kitchen** |  |  |  |  |  |
| no | 134 (91.2%) | 163 (90.6%) | 171 (85.5%) | 165 (86.4%) | 641 (88.3%) |
| yes | 13 (8.8%) | 17 (9.4%) | 27 (13.5%) | 23 (12.0%) | 80 (11.0%) |
| **Hard vinyl floor in the bathroom** |  |  |  |  |  |
| no | 142 (96.6%) | 173 (96.1%) | 183 (91.5%) | 172 (90.1%) | 678 (93.4%) |
| yes | 5 (3.4%) | 7 (3.9%) | 15 (7.5%) | 16 (8.4%) | 43 (5.9%) |
| **Laminate floor in the bathroom** |  |  |  |  |  |
| no | 147 (100%) | 178 (98.9%) | 195 (97.5%) | 188 (98.4%) | 716 (98.6%) |
| yes | 0 (0%) | 2 (1.1%) | 3 (1.5%) | 0 (0%) | 5 (0.7%) |
| **Wallpaper in mother’s room** |  |  |  |  |  |
| no | 144 (98.0%) | 179 (99.4%) | 194 (97.0%) | 184 (96.3%) | 708 (97.5%) |
| yes | 3 (2.0%) | 1 (0.6%) | 4 (2.0%) | 4 (2.1%) | 13 (1.8%) |
| **PVC panel wall cover in mother’s room** |  |  |  |  |  |
| no | 147 (100%) | 179 (99.4%) | 198 (99.0%) | 188 (98.4%) | 720 (99.2%) |
| yes | 0 (0%) | 1 (0.6%) | 0 (0%) | 0 (0%) | 1 (0.1%) |
| **Plastic window bind in mother’s room** |  |  |  |  |  |
| no | 104 (70.7%) | 124 (68.9%) | 135 (67.5%) | 131 (68.6%) | 498 (68.6%) |
| yes | 36 (24.5%) | 52 (28.9%) | 55 (27.5%) | 54 (28.3%) | 201 (27.7%) |
| **Wallpaper in child’s room** |  |  |  |  |  |
| no | 120 (81.6%) | 140 (77.8%) | 147 (73.5%) | 143 (74.9%) | 556 (76.6%) |
| yes | 1 (0.7%) | 5 (2.8%) | 3 (1.5%) | 1 (0.5%) | 11 (1.5%) |
| **PVC panel in child’s room** |  |  |  |  |  |
| no | 121 (82.3%) | 144 (80.0%) | 150 (75.0%) | 144 (75.4%) | 566 (78.0%) |
| yes | 0 (0%) | 1 (0.6%) | 0 (0%) | 0 (0%) | 1 (0.1%) |
| **Plastic window blinds in child’s room** |  |  |  |  |  |
| no | 83 (56.5%) | 108 (60.0%) | 99 (49.5%) | 101 (52.9%) | 395 (54.4%) |
| yes | 38 (25.9%) | 37 (20.6%) | 51 (25.5%) | 43 (22.5%) | 172 (23.7%) |
| **Painted wall in the living room** |  |  |  |  |  |
| no | 132 (89.8%) | 151 (83.9%) | 176 (88.0%) | 174 (91.1%) | 640 (88.2%) |
| yes | 15 (10.2%) | 29 (16.1%) | 22 (11.0%) | 14 (7.3%) | 81 (11.2%) |
| **PVC panel in the living room** |  |  |  |  |  |
| no | 147 (100%) | 180 (100%) | 198 (99.0%) | 188 (98.4%) | 721 (99.3%) |
| missing | 0 (0%) | 0 (0%) | 2 (1.0%) | 3 (1.6%) | 5 (0.7%) |
| **Plastic window blinds in the living room** |  |  |  |  |  |
| no | 109 (74.1%) | 140 (77.8%) | 153 (76.5%) | 140 (73.3%) | 546 (75.2%) |
| yes | 33 (22.4%) | 36 (20.0%) | 41 (20.5%) | 47 (24.6%) | 161 (22.2%) |
| **Number of plastic toys in mother’s bedroom** |  |  |  |  |  |
| 0 | 100 (68.0%) | 111 (61.7%) | 136 (68.0%) | 126 (66.0%) | 477 (65.7%) |
| 1-4 | 26 (17.7%) | 53 (29.4%) | 36 (18.0%) | 41 (21.5%) | 160 (22.0%) |
| >=5 | 11 (7.5%) | 5 (2.8%) | 9 (4.5%) | 15 (7.9%) | 40 (5.5%) |
| **Plastic/foam floor playmats in mother’s room** |  |  |  |  |  |
| 0 | 134 (91.2%) | 167 (92.8%) | 180 (90.0%) | 181 (94.8%) | 670 (92.3%) |
| 1-4 | 1 (0.7%) | 2 (1.1%) | 3 (1.5%) | 1 (0.5%) | 7 (1.0%) |
| >=5 | 1 (0.7%) | 0 (0%) | 0 (0%) | 0 (0%) | 1 (0.1%) |
| **Number of plastic toys in child’s bedroom** |  |  |  |  |  |
| 0 | 39 (26.5%) | 38 (21.1%) | 46 (23.0%) | 40 (20.9%) | 163 (22.5%) |
| 1-4 | 44 (29.9%) | 58 (32.2%) | 49 (24.5%) | 56 (29.3%) | 213 (29.3%) |
| >=5 | 34 (23.1%) | 41 (22.8%) | 48 (24.0%) | 43 (22.5%) | 167 (23.0%) |
| **Plastic/foam floor playmats in child’s room** |  |  |  |  |  |
| 0 | 111 (75.5%) | 129 (71.7%) | 136 (68.0%) | 128 (67.0%) | 511 (70.4%) |
| 1-4 | 4 (2.7%) | 7 (3.9%) | 6 (3.0%) | 8 (4.2%) | 25 (3.4%) |
| >=5 | 2 (1.4%) | 2 (1.1%) | 1 (0.5%) | 3 (1.6%) | 8 (1.1%) |
| **Number of plastic toys in living room** |  |  |  |  |  |
| 0 | 35 (23.8%) | 35 (19.4%) | 42 (21.0%) | 46 (24.1%) | 159 (21.9%) |
| 1-4 | 58 (39.5%) | 62 (34.4%) | 61 (30.5%) | 66 (34.6%) | 252 (34.7%) |
| >=5 | 46 (31.3%) | 73 (40.6%) | 85 (42.5%) | 70 (36.6%) | 276 (38.0%) |
| **Plastic/foam floor playmats in living room** |  |  |  |  |  |
| 0 | 111 (75.5%) | 140 (77.8%) | 152 (76.0%) | 152 (79.6%) | 562 (77.4%) |
| 1-4 | 24 (16.3%) | 23 (12.8%) | 30 (15.0%) | 23 (12.0%) | 101 (13.9%) |
| >=5 | 5 (3.4%) | 7 (3.9%) | 6 (3.0%) | 7 (3.7%) | 25 (3.4%) |

|  | **Q1 (n=147)** | **Q2 (n=180)** | **Q3 (n=200)** | **Q4 (n=191)** | **Total (n=726)** |
| --- | --- | --- | --- | --- | --- |
| **Frequency of using furniture polish** |  |  |  |  |  |
| never | 108 (73.5%) | 141 (78.3%) | 150 (75.0%) | 145 (75.9%) | 548 (75.5%) |
| <monthly | 10 (6.8%) | 13 (7.2%) | 18 (9.0%) | 15 (7.9%) | 57 (7.9%) |
| monthly | 10 (6.8%) | 9 (5.0%) | 9 (4.5%) | 10 (5.2%) | 39 (5.4%) |
| weekly | 12 (8.2%) | 7 (3.9%) | 9 (4.5%) | 9 (4.7%) | 39 (5.4%) |
| **Frequency of using floor polish** |  |  |  |  |  |
| never | 123 (83.7%) | 156 (86.7%) | 169 (84.5%) | 168 (88.0%) | 623 (85.8%) |
| <monthly | 6 (4.1%) | 7 (3.9%) | 10 (5.0%) | 4 (2.1%) | 27 (3.7%) |
| monthly | 4 (2.7%) | 5 (2.8%) | 4 (2.0%) | 4 (2.1%) | 17 (2.3%) |
| weekly | 5 (3.4%) | 2 (1.1%) | 3 (1.5%) | 3 (1.6%) | 14 (1.9%) |
| daily | 1 (0.7%) | 0 (0%) | 0 (0%) | 0 (0%) | 1 (0.1%) |
| **Frequency of using dusting polish** |  |  |  |  |  |
| never | 105 (71.4%) | 138 (76.7%) | 149 (74.5%) | 146 (76.4%) | 542 (74.7%) |
| <monthly | 6 (4.1%) | 7 (3.9%) | 17 (8.5%) | 7 (3.7%) | 37 (5.1%) |
| monthly | 10 (6.8%) | 9 (5.0%) | 7 (3.5%) | 10 (5.2%) | 37 (5.1%) |
| Weekly | 18 (12.2%) | 16 (8.9%) | 13 (6.5%) | 14 (7.3%) | 63 (8.7%) |
| Daily | 1 (0.7%) | 0 (0%) | 0 (0%) | 2 (1.0%) | 4 (0.6%) |
| **Frequency of using solvents** |  |  |  |  |  |
| Never | 74 (50.3%) | 88 (48.9%) | 97 (48.5%) | 95 (49.7%) | 357 (49.2%) |
| <monthly | 41 (27.9%) | 61 (33.9%) | 49 (24.5%) | 48 (25.1%) | 203 (28.0%) |
| Monthly | 21 (14.3%) | 18 (10.0%) | 32 (16.0%) | 25 (13.1%) | 96 (13.2%) |
| weekly | 4 (2.7%) | 3 (1.7%) | 8 (4.0%) | 11 (5.8%) | 27 (3.7%) |
| **Opening windows > 1hr in winter (mb)** |  |  |  |  |  |
| Never | 83 (56.5%) | 94 (52.2%) | 96 (48.0%) | 89 (46.6%) | 367 (50.6%) |
| 1-2 times/month | 17 (11.6%) | 33 (18.3%) | 34 (17.0%) | 26 (13.6%) | 110 (15.2%) |
| 1-2 times/week | 11 (7.5%) | 13 (7.2%) | 14 (7.0%) | 20 (10.5%) | 59 (8.1%) |
| >2 times/week | 16 (10.9%) | 16 (8.9%) | 24 (12.0%) | 25 (13.1%) | 81 (11.2%) |
| **Opening windows > 1 hr in summer (mb)** |  |  |  |  |  |
| Never | 12 (8.2%) | 17 (9.4%) | 13 (6.5%) | 19 (9.9%) | 63 (8.7%) |
| 1-2 times/month | 18 (12.2%) | 15 (8.3%) | 17 (8.5%) | 16 (8.4%) | 66 (9.1%) |
| 1-2 times/week | 18 (12.2%) | 20 (11.1%) | 27 (13.5%) | 21 (11.0%) | 86 (11.8%) |
| >2 times/week | 84 (57.1%) | 107 (59.4%) | 108 (54.0%) | 108 (56.5%) | 412 (56.7%) |
| **Opening windows > 1hr in winter (cb)** |  |  |  |  |  |
| Never | 42 (28.6%) | 57 (31.7%) | 62 (31.0%) | 49 (25.7%) | 213 (29.3%) |
| 1-2 times/month | 7 (4.8%) | 9 (5.0%) | 10 (5.0%) | 7 (3.7%) | 33 (4.5%) |
| 1-2 times/week | 4 (2.7%) | 6 (3.3%) | 5 (2.5%) | 6 (3.1%) | 21 (2.9%) |
| >2 times/week | 4 (2.7%) | 2 (1.1%) | 1 (0.5%) | 5 (2.6%) | 12 (1.7%) |
| **Opening windows > 1hr in summer (cb)** |  |  |  |  |  |
| Never | 13 (8.8%) | 21 (11.7%) | 14 (7.0%) | 23 (12.0%) | 72 (9.9%) |
| 1-2 times/month | 5 (3.4%) | 10 (5.6%) | 11 (5.5%) | 4 (2.1%) | 31 (4.3%) |
| 1-2 times/week | 17 (11.6%) | 8 (4.4%) | 16 (8.0%) | 10 (5.2%) | 51 (7.0%) |
| >2 times/week | 25 (17.0%) | 32 (17.8%) | 33 (16.5%) | 30 (15.7%) | 121 (16.7%) |
| **Opening windows > 1hr in winter (living)** |  |  |  |  |  |
| Never | 66 (44.9%) | 83 (46.1%) | 84 (42.0%) | 79 (41.4%) | 317 (43.7%) |
| 1-2 times/month | 19 (12.9%) | 30 (16.7%) | 30 (15.0%) | 32 (16.8%) | 111 (15.3%) |
| 1-2 times/week | 10 (6.8%) | 12 (6.7%) | 21 (10.5%) | 20 (10.5%) | 63 (8.7%) |
| >2 times/week | 7 (4.8%) | 17 (9.4%) | 14 (7.0%) | 17 (8.9%) | 56 (7.7%) |
| **Opening windows > 1hr in summer (living)** |  |  |  |  |  |
| Never | 25 (17.0%) | 23 (12.8%) | 21 (10.5%) | 16 (8.4%) | 86 (11.8%) |
| 1-2 times/month | 8 (5.4%) | 13 (7.2%) | 16 (8.0%) | 16 (8.4%) | 53 (7.3%) |
| 1-2 times/week | 19 (12.9%) | 18 (10.0%) | 29 (14.5%) | 17 (8.9%) | 84 (11.6%) |
| >2 times/week | 57 (38.8%) | 84 (46.7%) | 80 (40.0%) | 101 (52.9%) | 326 (44.9%) |
| **Mattress cover on mother’s bed** |  |  |  |  |  |
| No | 71 (48.3%) | 73 (40.6%) | 94 (47.0%) | 94 (49.2%) | 337 (46.4%) |
| Yes | 31 (21.1%) | 48 (26.7%) | 44 (22.0%) | 30 (15.7%) | 154 (21.2%) |
| **Mattress cover on baby’s mattress** |  |  |  |  |  |
| No | 37 (25.2%) | 39 (21.7%) | 55 (27.5%) | 42 (22.0%) | 173 (23.8%) |
| Yes | 24 (16.3%) | 24 (13.3%) | 19 (9.5%) | 16 (8.4%) | 84 (11.6%) |


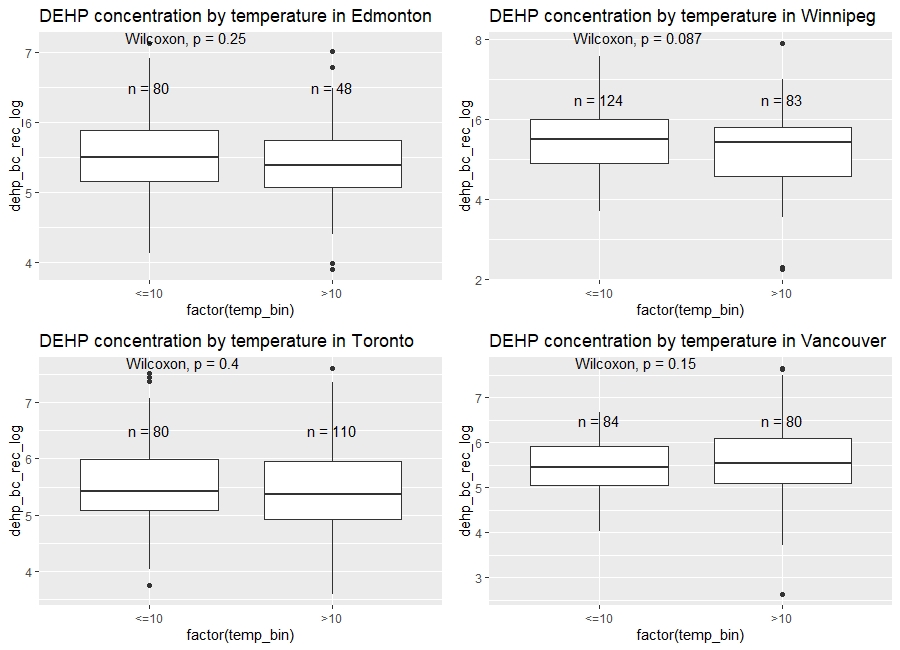
Figure S1. Distribution of DEHP concentrations by other characteristics (insignificant results) *(ambient temperature on the sampling day, plastic playmats in each room, plastic toys in each room, frequency of using polish products, use of vacuum, home construction period, study center)*


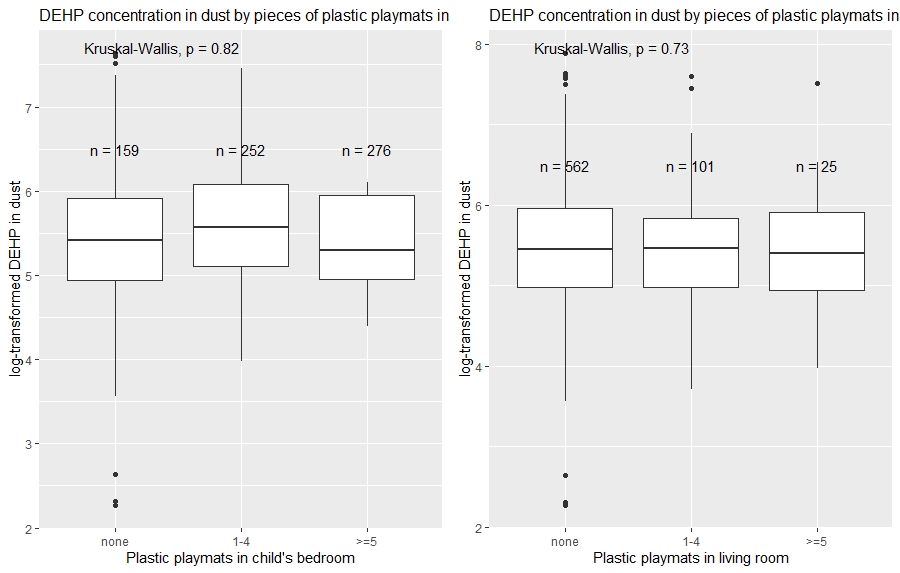


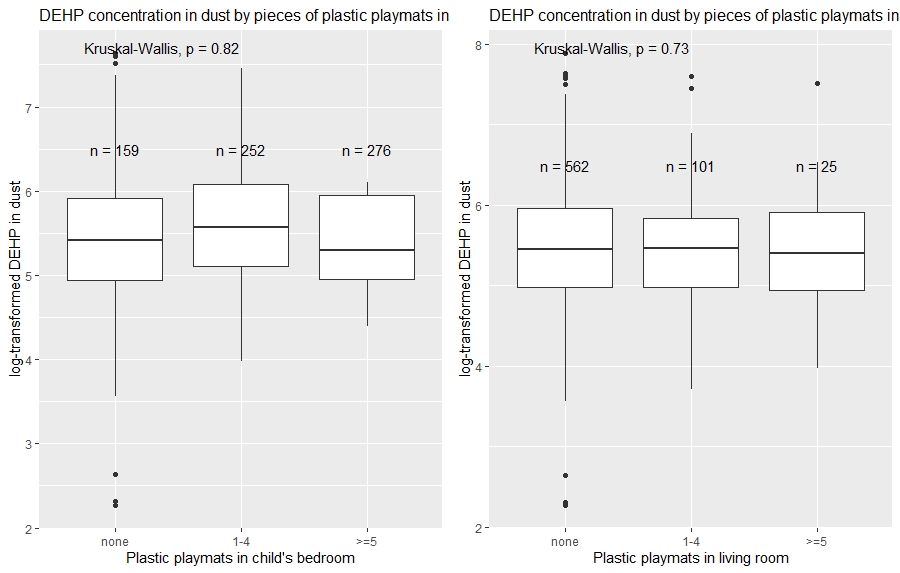


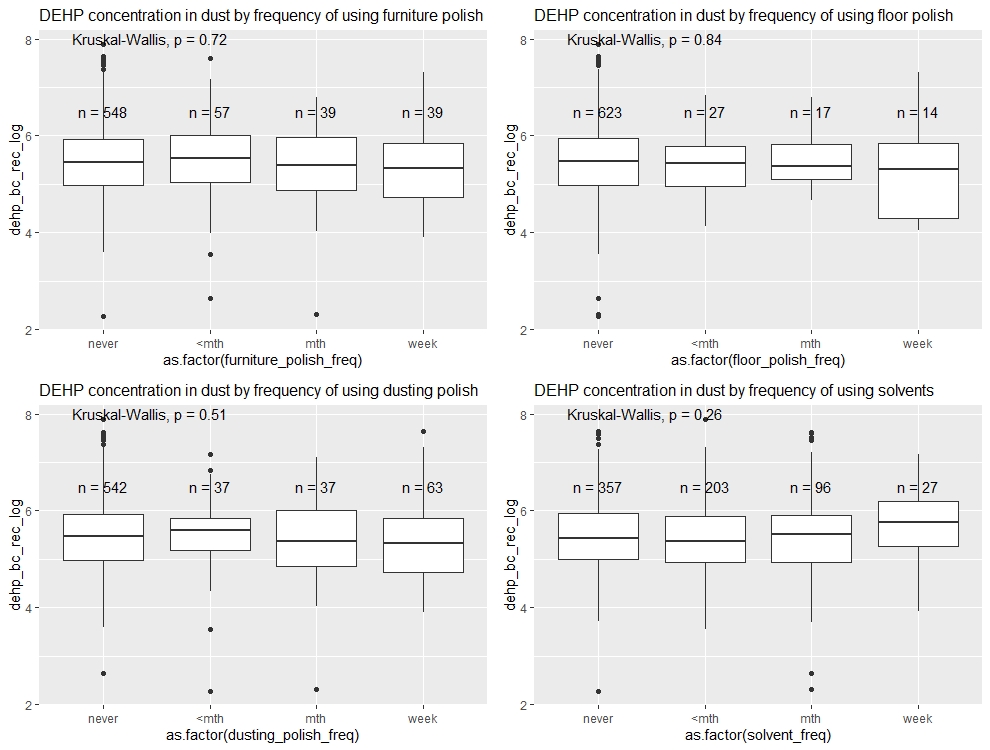

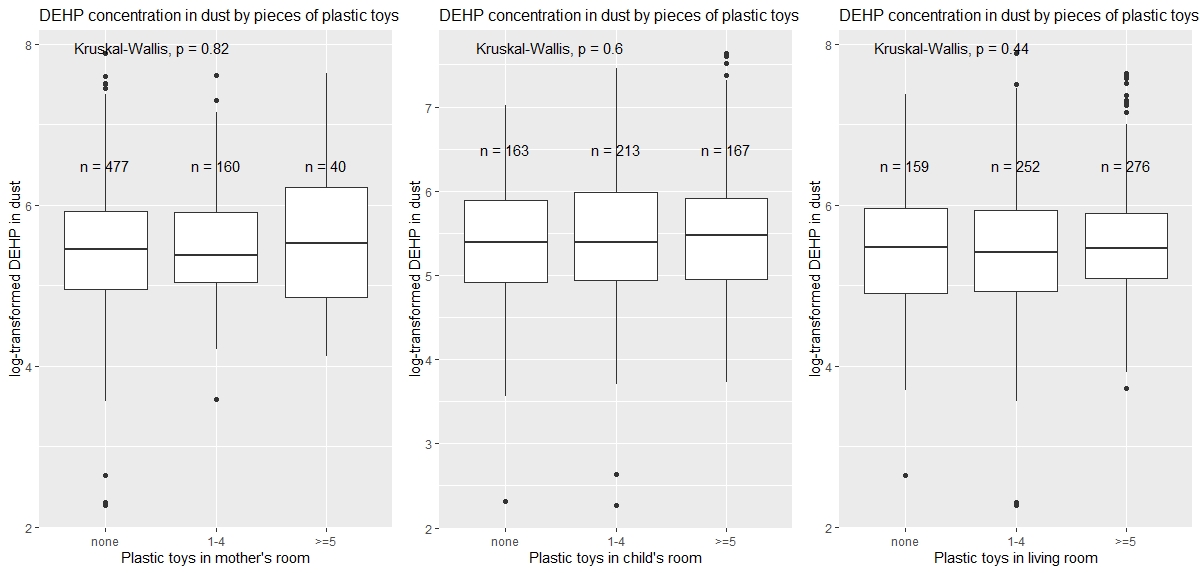


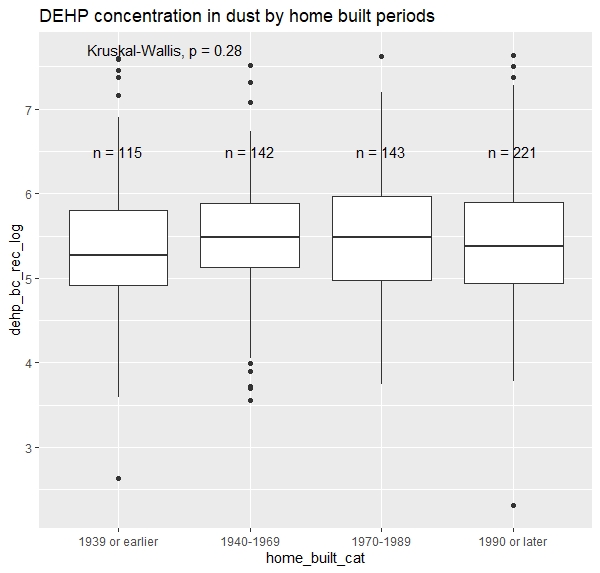

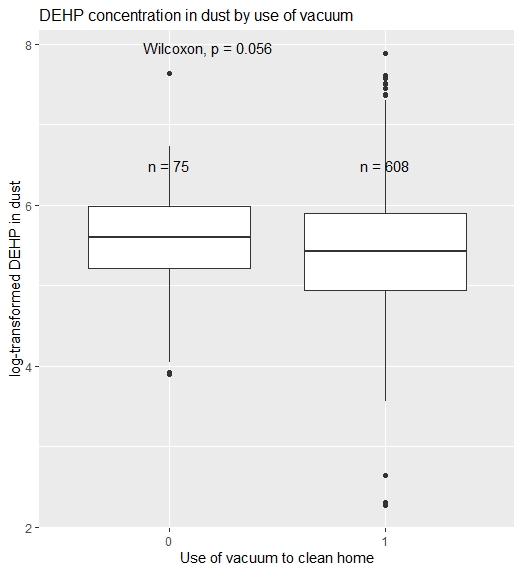


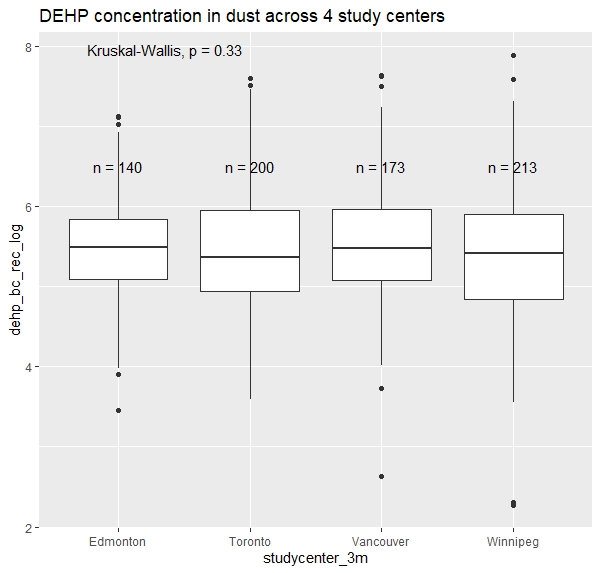


## Figure S2. DEHP in dust concentrations by household income groups


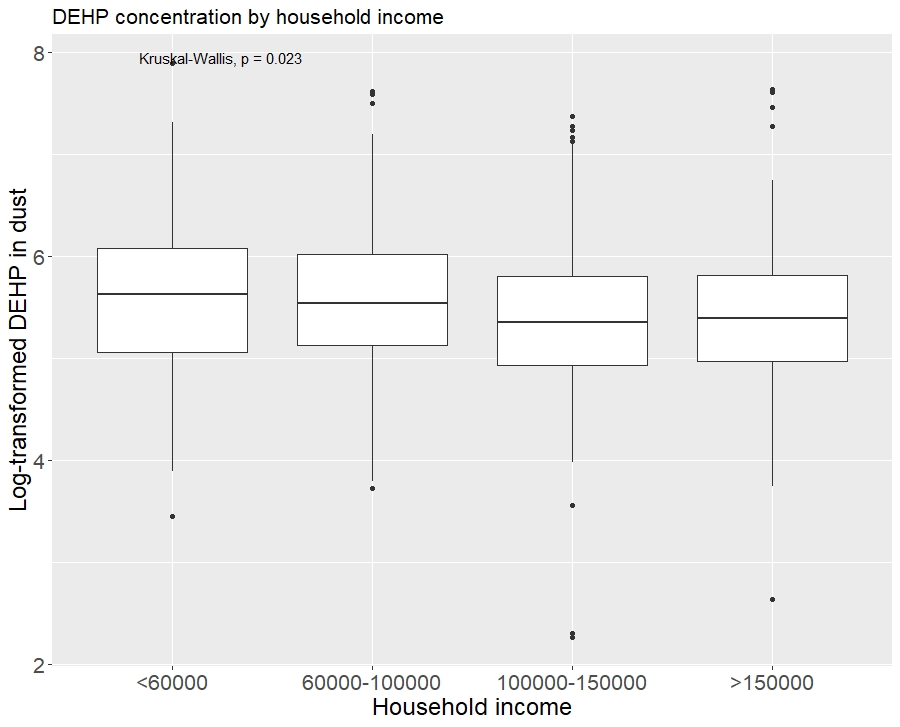


## Table S5. Distribution of DEHP-related housing characteristics by household income

|  | **<60000** | **60000-** | **100000-** | **>150000** | **Overall** | **P-value** |
| --- | --- | --- | --- | --- | --- | --- |
| **(N=116)** | **100000** | **150000** | **(N=153)** | **(N=726)** |  |
|  | **(N=186)** | **(N=190)** |  |  |  |
| **Vinyl flooring in kitchens or bathrooms** |  |  |  |  |  | 0.02 * |
| no | 103 | 159 | 175 | 145 | 651 |  |
|  | (88.8%) | (85.5%) | (92.1%) | (94.8%) | (89.7%) |
| yes | 13 | 26 | 12 | 8 (5.2%) | 70 |  |
|  | (11.2%) | (14.0%) | (6.3%) |  | (9.6%) |
| **Mold signs** |  |  |  |  |  | 0.05 . |
| no | 63 | 116 | 122 | 110 | 468 |  |
|  | (54.3%) | (62.4%) | (64.2%) | (71.9%) | (64.5%) |
| yes | 49 | 66 | 63 | 42 | 240 |  |
|  | (42.2%) | (35.5%) | (33.2%) | (27.5%) | (33.1%) |
| **Mattress covering on baby's sleeping bed** |  |  |  |  |  | 0.05 . |
| no | 15 | 52 | 53 | 40 | 173 |  |
|  | (12.9%) | (28.0%) | (27.9%) | (26.1%) | (23.8%) |
| yes | 7 | 14 (7.5%) | 24 | 31 | 84 |  |
|  | (6.0%) |  | (12.6%) | (20.3%) | (11.6%) |
| **Quantity of plastic furniture** |  |  |  |  |  | 0.34 |
| 0-3 pieces | 35 | 54 | 49 | 40 | 201 |  |
|  | (30.2%) | (29.0%) | (25.8%) | (26.1%) | (27.7%) |
| 4-6 pieces | 21 | 43 | 53 | 43 | 185 |  |
|  | (18.1%) | (23.1%) | (27.9%) | (28.1%) | (25.5%) |
| 7-9 pieces | 21 | 28 | 33 | 35 | 131 |  |
|  | (18.1%) | (15.1%) | (17.4%) | (22.9%) | (18.0%) |
| more than 10 | 33 | 57 | 49 | 33 | 186 |  |
| pieces | (28.4%) | (30.6%) | (25.8%) | (21.6%) | (25.6%) |

## Table S6. Correlation between DEHP concentrations across two home visits

| **Room** | **N1** | **N2** | **Number of both visits** | **Geomean 1st visit**  **(**µg/g**)** | **Geomean 2nd visit (**µg/g**)** | **Spearman correlation coef.** | **p-value** |
| --- | --- | --- | --- | --- | --- | --- | --- |
| Bedroom | 39 | 40 | 26 | 274.1 | 395.9 | 0.62 | <0.01 |
| Most used living room | 39 | 38 | 28 | 270.1 | 322.3 | 0.7 | <0.01 |

Note: the two home visits (assessments) were separated by approximately six months apart. The 1st home assessment was performed in June and the 2nd was performed in November.

## Table S7. Distribution of dichotomized DEHP levels in bedrooms and most used family rooms

|  | Living room  Bedroom | Low | High | Total |
| --- | --- | --- | --- | --- |
| 1st visit | Low | 12 | 4 | 16 |
| High | 7 | 12 | 19 |
| 2nd visit | Low | 12 | 7 | 19 |
| High | 7 | 12 | 19 |

## Table S8. Comparison of median phthalate concentrations (μg/g) in dust as reported in other studies

| **Study, Country** | **Sampling year** | **N** | **median concentration**  **(μg /g)** |
| --- | --- | --- | --- |
| This study, Canada | 2010-2012 | 726 | 232 |
| Wan et al., Canada (1) | 2014-2015 | 79 | 257 |
| Yang et al., Canada (2) | 2015 | 51 | 218 |
| Kubwabo et al., Canada  (Canadian house dust study) (3) | 2007-2010 | 126 | 426 |
| Guo and Kannan, US (4) | 2007-2010 | 33 | 304 |
| Bi et al., US (5) | 2014-2015 | 54 | 155 |
| Kolarik et al., Bulgaria (6) | 2004-2005 | 177 | 1050 |
| Bornehag et al., Sweden (7) | 2001-2002 | 390 | 770 |
| Luongo and Ostman, Sweden (8) | 2008 | 62 | 449 |
| Langer et al., Denmark (9) | 2008 | 497 | 210 |
| Guo and Kannan, China (4) | 2010 | 75 | 228 |
| Zhang et al., China (10) | 2013-2016 | 356 | 127 |
| Zhu et al., China (11) | 2017-2018 | 120 | 105 |

## References

1. Wan Y, North ML, Navaranjan G, Ellis AK, Siegel JA, Diamond ML. Indoor exposure to phthalates and polycyclic aromatic hydrocarbons (PAHs) to Canadian children: the Kingston allergy birth cohort. J Expo Sci Environ Epidemiol. 2021 Apr 14;1–13.

2. Yang C, Harris SA, Jantunen LM, Kvasnicka J, Nguyen LV, Diamond ML. Phthalates: Relationships between Air, Dust, Electronic Devices, and Hands with Implications for Exposure. Environ Sci Technol [Internet]. 2020 Jun 15 [cited 2022 May 5]; Available from: https://pubs.acs.org/doi/pdf/10.1021/acs.est.0c00229

3. Kubwabo C, Rasmussen PE, Fan X, Kosarac I, Wu F, Zidek A, et al. Analysis of selected phthalates in Canadian indoor dust collected using household vacuum and standardized sampling techniques. Indoor Air. 2013 Dec;23(6):506–14.

4. Guo Y, Kannan K. Comparative assessment of human exposure to phthalate esters from house dust in China and the United States. Environ Sci Technol. 2011 Apr 15;45(8):3788–94.

5. Bi C, Maestre JP, Li H, Zhang G, Givehchi R, Mahdavi A, et al. Phthalates and organophosphates in settled dust and HVAC filter dust of U.S. low-income homes: Association with season, building characteristics, and childhood asthma. Environ Int. 2018;121(Pt 1):916–30.

6. Kolarik B, Bornehag CG, Naydenov K, Sundell J, Stavova P, Nielsen OF. The concentrations of phthalates in settled dust in Bulgarian homes in relation to building characteristic and cleaning habits in the family. Atmos Environ. 2008 Dec 1;42(37):8553–9.

7. Bornehag CG, Lundgren B, Weschler CJ, Sigsgaard T, Hagerhed-Engman L, Sundell J. Phthalates in Indoor Dust and Their Association with Building Characteristics. Environ Health Perspect. 2005 Oct;113(10):1399–404.

8. Luongo G, Östman C. Organophosphate and phthalate esters in settled dust from apartment buildings in Stockholm. Indoor Air. 2016;26(3):414–25.

9. Langer S, Weschler CJ, Fischer A, Bekö G, Toftum J, Clausen G. Phthalate and PAH concentrations in dust collected from Danish homes and daycare centers. Atmos Environ. 2010 Jun 1;44(19):2294–301.

10. Zhang Q, Sun Y, Zhang Q, Hou J, Wang P, Kong X, et al. Phthalate exposure in Chinese homes and its association with household consumer products. Sci Total Environ. 2020 Jun;719:136965.

11. Zhu Q, Jia J, Zhang K, Zhang H, Liao C, Jiang G. Phthalate esters in indoor dust from several regions, China and their implications for human exposure. Sci Total Environ. 2019 Feb 20;652:1187–94.
